# Supplementary material for: Bi-directional ribosome scanning controls the stringency of start codon selection
Source: PubMed Central journal article supplement (PMC8593136; doi:10.1038/s41467-021-26923-3), 2021-11-15
Supplement: 41467_2021_26923_MOESM3_ESM.pdf [file 41467_2021_26923_MOESM3_ESM.pdf]

### **Description of Additional Supplementary Files**

File Name: Supplementary Data 1

Description: List of primers and sgRNA targeting sequences
